# A *Gata2* intronic enhancer confers its pan-endothelia-specific regulation

Melin Khandekar<sup>1,\*</sup>, William Brandt<sup>1,\*</sup>, Yinghui Zhou<sup>1,†</sup>, Susan Dagenais<sup>2</sup>, Thomas W. Glover<sup>2</sup>, Norio Suzuki<sup>3</sup>, Ritsuko Shimizu<sup>1,3</sup>, Masayuki Yamamoto<sup>3</sup>, Kim-Chew Lim<sup>1</sup> and James Douglas Engel<sup>1,‡</sup>

GATA-2, a transcription factor that has been shown to play important roles in multiple organ systems during embryogenesis, has been ascribed the property of regulating the expression of numerous endothelium-specific genes. However, the transcriptional regulatory hierarchy governing *Gata2* activation in endothelial cells has not been fully explored. Here, we document GATA-2 endothelial expression during embryogenesis by following GFP expression in *Gata2*-GFP knock-in embryos. Using founder transgenic analyses, we identified a *Gata2* endothelium enhancer in the fourth intron and found that *Gata2* regulation by this enhancer is restricted to the endocardial, lymphatic and vascular endothelium. Whereas disruption of three ETS-binding motifs within the enhancer diminished its activity, the ablation of its single E box extinguished endothelial enhancer-directed expression in transgenic mice. Development of the endothelium is known to require SCL (TAL1), and an SCL-E12 (SCL-Tcf2a) heterodimer can bind the crucial E box in the enhancer in vitro. Thus, GATA-2 is expressed early in lymphatic, cardiac and blood vascular endothelial cells, and the pan-endothelium-specific expression of *Gata2* is controlled by a discrete intronic enhancer.

**KEY WORDS:** *Gata2*, Endothelium, Cardiovascular, Lymphatic, Enhancer, ETS, SCL, Mouse

## INTRODUCTION

In vertebrates, the vascular network is composed of separate blood and lymphatic systems. Although the blood and lymphatic systems are organized in parallel, the blood vasculature develops and is functional prior to lymphangiogenesis. The murine blood vasculature develops from angioblasts that are associated with the blood islands of the yolk sac. This process, known as vasculogenesis, results in the formation of the initial vascular network, which consists of paired dorsal aortae, the cardinal veins, the vitelline artery and vein, and the endocardial tubes. New endothelial cells and vessels are generated later via a process called angiogenesis (Risau, 1997). Further maturation of this new vasculature occurs via pruning of unneeded branches, resulting in the formation of the mature vascular network.

In the yolk sac, the blood islands consist of a thin layer of angioblasts surrounding primitive erythrocytes. Similarly, in the aorta-gonads-mesonephros region – the initial embryonic site of definitive hematopoiesis – hematopoietic stem cells can be detected budding from the endothelium of the dorsal aorta (de Bruijn et al., 2002). Given the close physical proximity of the very earliest hematopoietic and endothelial cells, it has been speculated that they originate from a common progenitor cell, which has been termed the hemangioblast. A number of transcription factors have been shown to play a role in the development of both cell lineages: for example, *cloche* is required for the formation of endothelial and hematopoietic progenitors in zebrafish (Stainier et al., 1995) and *Scl* (also known as *Tal1* – Mouse Genome Informatics), which

encodes a basic helix-loop-helix transcription factor, was initially shown to be required for hematopoietic development in mice (Robb et al., 1995; Shivdasani et al., 1995). Subsequent transgenic rescue of the hematopoietic defect in *Scl*-null embryos revealed a requirement for SCL in the remodeling of the yolk sac vasculature (Visvader et al., 1998), and it has since been shown to play a role in vasculogenesis (Patterson et al., 2005), as well as in the migration and morphogenesis of endothelial cells (Lazrak et al., 2004). Transgenic expression of SCL is able to rescue the phenotypic consequences of *cloche* mutation in the zebrafish, suggesting that *Scl* functions downstream of *cloche* (Liao et al., 1998). LMO2, a member of the LIM domain family, is required for primitive erythropoiesis in the embryo; *Lmo2* ablation results in death at embryonic day (E) 9.75 secondary to hematopoietic failure (Warren et al., 1994). Analysis of chimeric mice bearing contributions from *Lmo2*<sup>-/-</sup> embryonic stem (ES) cells revealed that angiogenic remodeling of blood vessels requires *Lmo2* (Yamada et al., 2000). Similarly, targeted disruption of the transcription factor *Runx1* eliminates definitive hematopoiesis and results in defective angiogenesis and hemorrhaging throughout the CNS (Wang et al., 1996).

The most-widely accepted and experimentally supported model for lymphatic development has proposed that the lymphatic vasculature arises from the blood vasculature (Sabin, 1902; Sabin, 1904; Wigle and Oliver, 1999). Expression of the lymphatic endothelial hyaluronan receptor gene (*Lyve1*; also known as *Xlkd1* – Mouse Genome Informatics) at E9-9.5 in endothelial cells lining the anterior cardinal vein is the first sign that these cells are competent to become lymphatic endothelial cells (LECs). The lymphatic regulatory gene *Prox1*, encoding a homeobox transcription factor, is expressed several hours later in a subset of LYVE1<sup>+</sup> cells in the anterior cardinal vein (Oliver, 2004). Expression of the murine vascular endothelial growth factor receptor 3 gene (*Vegfr3*, also known as *Flt4* – Mouse Genome Informatics), which binds VEGFC, is detected in blood and lymphatic vessels during early embryogenesis, but becomes largely restricted to lymphatic vessels after E14.5 (Kaipainen et al., 1995).

<sup>1</sup>Department of Cell and Developmental Biology and <sup>2</sup>Department of Human Genetics, University of Michigan Medical School, Ann Arbor, MI 48109-2200, USA.  
<sup>3</sup>TARA Centre, University of Tsukuba, 1-1-1 Tennoudai, Tsukuba 305-8577, Japan.

\*These authors contributed equally to this work

<sup>†</sup>Present address: Aveo Pharmaceuticals, 75 Sidney Street, Cambridge, MA 02139, USA

<sup>‡</sup>Author for correspondence (e-mail: engel@umich.edu)

Beginning at E10.5, LECs bud and migrate away from the anterior cardinal vein in a polarized non-random manner, and eventually fuse to form primitive lymph sacs from which new LECs sprout and spread into the surrounding tissues and organs (Wigle and Oliver, 1999). Finally, the lymphatic plexus undergoes remodeling and maturation in the terminal stages of lymphatic development (Oliver, 2004; Oliver and Alitalo, 2005; Sabin, 1902; Sabin, 1904). Little is known about the molecular events leading to lymphatic development, but gene-ablation studies in mice and the identification of human hereditary-lymphedema causative genes indicate that *Prox1*, *Vegfc*, *Vegfr3*, *Foxc2* and *Sox18* are requisites to the process (Wigle et al., 2002; Wigle and Oliver, 1999; Fang et al., 2000; Irrthum et al., 2003; Karkkainen et al., 2000; Karkkainen et al., 2004; Petrova et al., 2004).

GATA factors belong to an evolutionarily conserved family of C<sub>4</sub> zinc-finger transcription factors that play demonstrably crucial roles in development. There are six GATA family members in vertebrates, which have historically been subdivided into two subfamilies. GATA-1, GATA-2 and GATA-3 are all important in the development of different hematopoietic lineages – erythroid, hematopoietic progenitor and T-lymphoid, respectively – among many other activities (Pandolfi et al., 1995; Pevny et al., 1995; Tsai et al., 1994). Similarly, GATA-4, GATA-5 and GATA-6 have been shown to be involved in cardiac, genitourinary and multiple endodermal developmental events (Molkentin, 2000; Molkentin et al., 1997; Molkentin et al., 2000; Morrissey et al., 1998).

GATA-2 was originally cloned from a chicken reticulocyte cDNA library (Yamamoto et al., 1990), and was shown to be expressed in a wide variety of tissues, including hematopoietic, neuronal and endothelial cells. *Gata2*-null mutant embryos die at mid-gestation due to a block in primitive hematopoiesis (Tsai et al., 1994). Further examination of *Gata2* gain-of-function and in vitro differentiation of *Gata2*<sup>-/-</sup> ES cells showed that GATA-2 plays a pivotal role in the proliferation of very early hematopoietic progenitors (Briegleb et al., 1993; Kitajima et al., 2002; Tsai and Orkin, 1997), underscoring the conclusions from the initial loss-of-function experiments.

Given that many genes involved in hematopoiesis also participate in vascular development and that GATA-2 is strongly expressed in endothelial cell lines, it was originally believed that loss of GATA-2 function would result in vascular defects. Adding further to this expectation was early evidence that many genes that appeared to be crucial for endothelial development and function are regulated via GATA-binding sites (Dorfman et al., 1992). For example, GATA sites have been implicated in the regulation of the endothelium-specific genes preendothelin (immature form of EDN1) (Dorfman et al., 1992; Yamashita et al., 2001), *Pecam1* (Gumina et al., 1997), *Vegfr2* (Kappel et al., 2000; Minami et al., 2004), *eNOS* (also known as *Nos3* – Mouse Genome Informatics) (German et al., 2000) and *Icam2* (Cowan et al., 1998). Mutation of a GATA-binding site in the *Vegfr2* endothelium-specific enhancer completely abolished its activity in transgenic reporter assays, indicating that *Vegfr2* expression is dependent on GATA activity in vivo (Kappel et al., 2000). Surprisingly, however, the analysis of *Gata2*-null embryos failed to reveal any obvious defects in the vasculature at the time of their early embryonic demise (~E10) (Tsai et al., 1994), leaving the role for GATA-2 in endothelial function undefined.

To begin to investigate the role of GATA-2 in endothelial function, we systematically examined GFP expression in the developing vasculature of *Gata2*-GFP knock-in embryos during embryogenesis. We found that GFP was expressed in cells lining arterial and venous vessels formed during vasculogenesis and angiogenesis, and that its expression continued postnatally. We also observed GFP expression

in budding LECs during early lymphatic development, as well as in postnatal lymphatic vessels. We then functionally identified an endothelium-specific enhancer in *Gata2* intron 4 that could regulate the expression of a cis-linked reporter transgene in cardiovascular and lymphatic endothelial cells. Additionally, we found, using site-specific mutagenesis, that the potency of the minimal endothelium-specific enhancer is crucially dependent on an E box (CANNTG) motif. By contrast, disruption of three ETS-binding sites quantitatively reduced, but did not abolish, enhancer activity. Prior experiments showed that SCL activation is required for elaboration of the vasculature, and we demonstrate that SCL-E12 (E12 is also known as TCFE2A – Mouse Genome Informatics) heterodimers bind with high affinity to this crucial enhancer E box in vitro. Altogether, these data implicate ETS family members and SCL as in vivo activators of endothelium-specific *Gata2* transcription.

## MATERIALS AND METHODS

### Transgenic mice

Wild-type CD1 mice were mated with *Gata2*-GFP knock-in heterozygous mice, which had GFP inserted (in frame) at the translation initiation codon in *Gata2* exon 2 (Suzuki et al., 2006). Embryos were harvested at the times indicated in the text and figure legends, and processed for immunostaining as previously described (Khandekar et al., 2004). Reactivity to rabbit anti-GFP (1:1000; Molecular Probes), rat anti-PECAM (1:200; Pharmingen), goat anti-VEGFR3 (1:20; R&D Systems), rabbit anti-PROX1 (1:800; Covance) and rabbit anti-LYVE1 (1:400; Upstate) antibodies was detected using the appropriate fluorochrome-conjugated secondary antibodies, as indicated in the figure legends. Digital images were recorded as previously described (Khandekar et al., 2004).

For founder transgenic analyses, expression constructs were purified for microinjection into fertilized ova as previously described (Khandekar et al., 2004). At the indicated times, embryos from foster mothers or a *Gata2* YAC d16Z transgenic line were harvested for X-gal staining and PCR genotyping as previously described (Zhou et al., 1998). Transgenic embryos were photographed as whole-mount or cryosectioned specimens as described previously (Zhou et al., 1998).

### Expression-plasmid construction

For microinjection, plasmid GR22-*lacZ* was digested with different restriction enzymes (see legend to Fig. 3) (Zhou et al., 2000). Other *Gata2* fragments examined here were cloned 3' to the herpes simplex virus (HSV) thymidine kinase (TK) gene promoter in TKβ (Clontech) to mimic their natural position in the *Gata2* locus. To generate TKBXβ, a 2.9 kbp *Bam*HI-*Sal*I fragment from plasmid GR22 was first subcloned into pBluescript II (Stratagene) and then excised with *Xba*I before re-cloning into *Xba*I-digested TKβ. To generate TKSXβ, TKBXβ was treated with *Spe*I-*Sfi*I and T4 DNA polymerase before self-religation. To construct TKAAβ, a 460 bp *Alw*NI-*Apa*I fragment was excised from plasmid GR22 and treated with T4 DNA polymerase before being cloned into TKβ, which had been treated sequentially with *Xba*I and with Klenow polymerase. For microinjection, TKANβ was generated from TKAAβ by *Nco*I restriction-enzyme digestion. To delete the internal *Alw*NI-*Apa*I fragment, a plasmid subclone containing the 1.2 kbp *Sfi*I-*Xba*I *Gata2* intron 4 was treated with *Alw*NI-*Apa*I and T4 polymerase before self-religation. The resultant 0.8 kbp *Sfi*I-*Xba*I fragment was cloned into TKβ to generate TKSXΔAAβ. To clone the vascular endothelium-specific (VE) enhancer into TKβ (thereby generating TKVEβ, Fig. 5), primers Endocons(f) and Endocons(r) containing an engineered *Xba*I site (5'-gggtctagaCCATGGAGTACCTATACGTGTG-3' and 5'-gggtctaga-ACTGAGTCGAGGTGGCTCTG-3', respectively) were used to generate a 167 bp amplicon (defined by the arrows in Fig. 4A, Fig. 5A), which was verified by sequencing.

To mutate the E box in the VE enhancer, oligonucleotide-based PCR mutagenesis was performed to introduce mutations (from 5'-CATCTG-3' to 5'-CAccG-3'; mutations are lowercase) that had been shown to eliminate SCL binding in gel shift assays (Kappel et al., 2000). Primers EcSCLmut(f) (5'-CGGACAccGCAGCCG-3') and Endocons(r) (shown above) were used to generate a 3' fragment using GR22 plasmid as template in a PCR reaction.

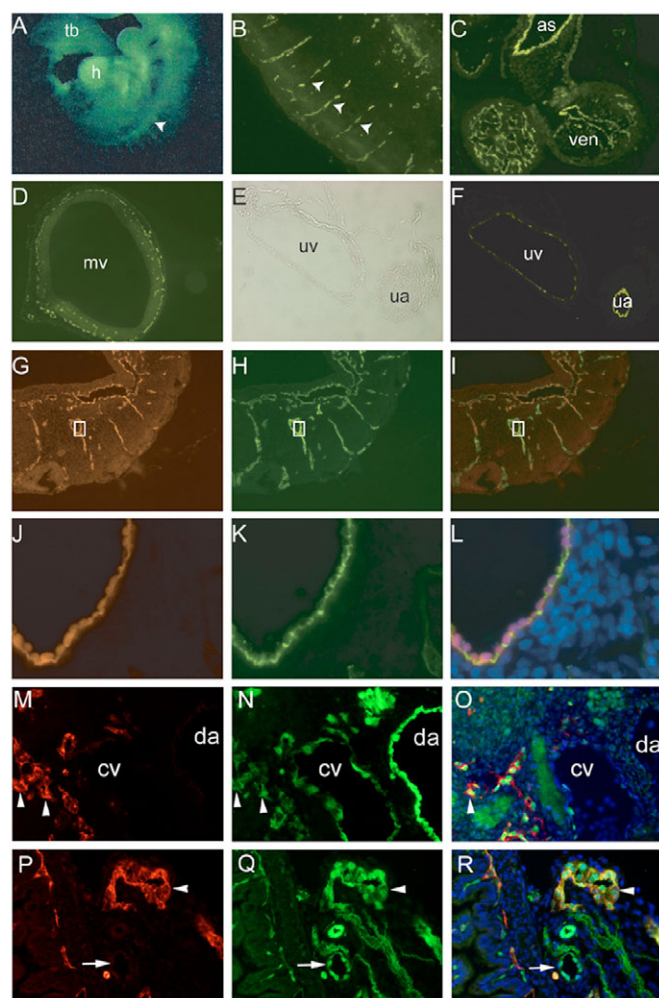

**Fig. 1. Endothelial GATA-2 expression in *Gata2*-GFP knock-in embryos.** (A-R) GFP expression in *Gata2*-GFP embryos at E9.5 (A), E10.5 (B-D, G-L), E11.5 (M-O), E18.5 (E, F) and postnatal day 1 (P1; P-R) was monitored by direct fluorescence (A), indirect immunofluorescence (B-D, F-R) or light (E) microscopy. (A) Robust GFP fluorescence is visualized in the heart and the dorsal aorta, a vessel formed by vasculogenesis (arrowhead), of a whole-mount embryo orientated with its head (not shown) facing to the left, towards the tail bud. (B-D, F) Transverse embryonic cryosections were stained for GFP using Alexa Fluor 488-conjugated secondary antibody. GFP immunoreactivity was detected in the intersomitic vessels (B, arrowheads) in the tail region of an embryo, in the endothelia lining the aortic sac (C), in the thin-walled umbilical vein and thick-walled umbilical artery (E, F), and in the endocardium of the heart ventricle (C), as well as in the vessels that begin to invade the neural tube, a typical example of sprouting angiogenesis (D). (E) A phase-contrast image of F. (G-L) The intersomitic vessels and the aorta in the tail region of an embryo co-stained for GFP (G, I) or PECAM (H, K) antigens using CY3- or Alexa Fluor 488-conjugated secondary antibodies, respectively. Coincidence of anti-PECAM and anti-GFP staining demonstrates that *Gata2* is expressed in endothelial cells (I, L). Boxed areas in G-I are magnified in J-L. (M, N) Transverse embryonic cryosections were stained for GFP (N) or VEGFR3 (M) using CY2- or CY3-conjugated secondary antibodies, respectively. Clustered cells in the vicinity of the anterior cardinal vein expressed both VEGFR3 and GFP (arrowheads). Notice that, although GFP immunofluorescence was detected strongly in endothelia of the dorsal aorta and cardinal vein, both of these blood vessels stained only weakly, in comparison to LECs, with anti-VEGFR3 antibody. (O) An adjacent section was co-stained with anti-PROX1 and anti-VEGFR3 antibodies using CY2- or CY3-conjugated secondary antibodies, respectively. Notice that VEGFR3-positive cells displayed anti-PROX1 nuclear staining (arrowhead), thus confirming their LEC identity. (P-R) P1 postnatal intestines and mesentery were sectioned and stained for VEGFR3 (P) and GFP (Q) expression as described above. Coincidence of staining in lymphatic vessels (arrowheads) is distinct from blood vessels that stained only for GFP (arrows). The nuclei in panels L, O and R were co-labeled with DAPI. h, heart; tb, tail bud; as, aortic sac; ven, ventricle; mv, mesencephalic vesicle; uv, umbilical vein; ua, umbilical artery; cv, cardinal vein; da, dorsal aorta.

Similarly, EcSCLmut(r) (5'-CGGCTGCgggTGTCGG-3') and Endocons(f) were used to generate a 5' fragment. The resultant amplicons were gel-purified and pooled as templates in a PCR reaction using Endocons(f) and Endocons(r) as primers. The gel-purified PCR products were sequenced to verify incorporation of the mutation and were then digested with *Xba*I prior to cloning into the *Xba*I site of TK $\beta$  to generate TKVE $\beta$ mScl (Fig. 5).

A similar strategy was used to introduce a mutation (5'-CGGA-3' to 5'-CGcg-3') that had been shown to eliminate ETS-factor binding (O'Reilly et al., 2003) into all three ETS-binding sites in the *Gata2* VE enhancer. The primers Ecmets1(f) (5'-CTCCTGCCGcgGTTTCCTAT-3'), Ecmets1(r) (5'-ATAGGAAACcgCGGCAGGAG-3'), Ecmets2(f) (5'-TTCCTATCCGcgCATCTGCAG-3'), Ecmets2(r) (5'-CTGCAGATGcgCGGATAGGAA-3'), Ecmets3(f) (5'-TGTTTCCGcgCGGCAA-3') and Ecmets3(r) (5'-TTGCCGcgCGGAAACA-3') were used to mutagenize the VE enhancer, as described above, and the enhancer was then sequenced to verify incorporation of the desired mutations. Fragments containing mutations in either the first two or all three ETS-binding motifs were digested with *Xba*I and then cloned into the *Xba*I site of TK $\beta$  to generate TKVE $\beta$ mEts1,2 (data not shown) or TKVE $\beta$ mEts1,2,3 (Fig. 5), respectively.

#### Electrophoretic mobility shift assay

Nuclear extracts were prepared as described previously (Tanimoto et al., 2000) from 293T human embryonic kidney cells that were either mock transfected or transfected with EF-1 $\alpha$  promoter-directed SCL cDNA alone

or with a CMV promoter-directed E12 expression plasmid. Either no extract or nuclear extract (35  $\mu$ g) was added to binding buffer containing 20 mM HEPES (pH 7.9), 1 mM MgCl<sub>2</sub>, 0.5 mM DTT and 37.5 ng/ $\mu$ l poly(dI-dC) at 4°C. Unlabeled oligonucleotides [20- or 200-fold molar excess; wild type (5'-TCCGGACATCTGCAGCCGGT-3'; E box underlined) or mutant (5'-TCCGGACAcceGCAGCCGGT-3'; E box underlined, mutated nucleotides lowercase)] or antibodies (Rodriguez et al., 2005) were added as indicated in the legend to Fig. 6. After 1 hour of pre-incubation, 2  $\mu$ l (2 $\times$ 10<sup>5</sup> cpm) of radiolabeled wild-type oligonucleotide probe was added to each sample and incubated for an additional 30 minutes. All samples were fractionated by electrophoresis on neutral 6% TBE/polyacrylamide gels. After electrophoresis, the gels were dried and recorded using a PhosphorImager (Molecular Dynamics).

## RESULTS

### Early, pan-endothelial expression of transcription factor GATA-2

Because the expression of GATA-2 had been reported in several endothelial cell lines (Dorfman et al., 1992; Umetani et al., 2001), we first investigated whether or not *Gata2* was expressed in all endothelial cells in vivo by analyzing GFP staining in the vasculature of *Gata2*-GFP knock-in heterozygotes (Suzuki et al., 2006). In whole-mount E9.5 embryos, robust GFP fluorescence was



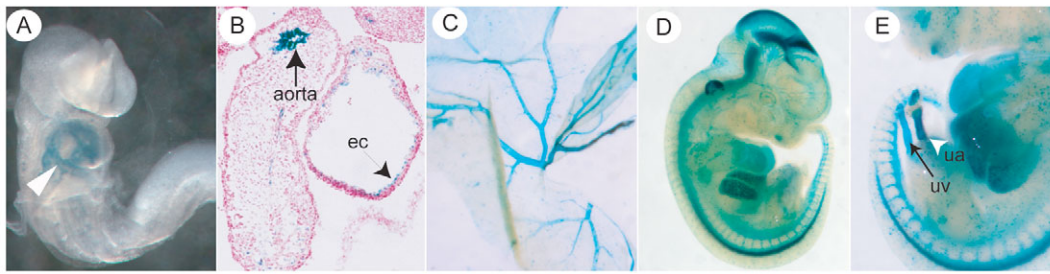

**Fig. 2. YAC d16Z contains *Gata2* endothelium regulatory sequences.** (A–E) Embryos at E8.5 (A), E10.5 (B) and E12.5 (C–E) bearing the *Gata2* d16 *lacZ*-tagged yeast artificial chromosome (Zhou et al., 1998) were stained for  $\beta$ -galactosidase activity as whole-mount (A, C–E) or cryosectioned (B) specimens. Strong *lacZ* expression was observed in the developing heart tube (arrowhead, A), in the aorta and the endocardium (ec; B), in the remodeled vasculature of the yolk sac (C), and in the embryo proper (D, E), as well as in the umbilical vessels (E), where the staining superficially appeared to be weaker in the umbilical vein (uv) than in the umbilical artery (ua).

detected in the dorsal aorta, a vessel formed by vasculogenesis, as well as in the developing heart (Fig. 1A). In transverse cryosections of E10.5 embryos, GFP-immunopositive cells were seen lining the intersomitic vessels (Fig. 1B, arrowheads), the aortic sac and ventricular endocardium (Fig. 1C), and the developing neural tube (Fig. 1D), a site of intense sprouting angiogenesis. These data showed that GATA-2 is abundantly expressed in vessels formed during primary vasculogenesis and angiogenesis.

To determine whether *Gata2* was expressed differentially in veins and arteries, we analyzed the umbilical cords of E18.5 embryos, in which a clear morphological distinction can be made between umbilical vein and artery (Fig. 1E). Although there was an apparent difference in the fluorescence intensity, GFP immunoreactivity could be readily visualized in both blood vessels (Fig. 1F). The differential GFP staining might be due to a genuine difference in expression level, or simply due to a difference in the optical density resulting from the greater surface area of the vein.

To verify that the GFP expression was indeed endothelium-specific, we performed co-immunostaining with antibodies directed against GFP and PECAM, an endothelial cell-specific cell-adhesion molecule. When E10.5 embryonic cryosections were stained with an anti-GFP antibody and a CY3-conjugated secondary antibody, vascular structures in the tail bud region stained strongly (Fig. 1G, J). When the same sections were co-stained for the detection of PECAM antigen using Alexa Fluor 488-conjugated secondary antibody (Fig. 1H, K), the anti-GFP and anti-PECAM immunofluorescence were completely coincident (Fig. 1I, L), verifying that *Gata2* is expressed quite specifically in vascular endothelial cells.

To investigate whether *Gata2* is expressed in the lymphatic vasculature, serial transverse cryosections of an E11.5 *Gata2*<sup>+/GFP</sup> embryo were stained with anti-VEGFR3 (Fig. 1M) or anti-GFP (Fig. 1N) antibodies. GFP fluorescence was detected strongly in the cardinal vein and dorsal aorta, as well as in clustered cells lying near the anterior cardinal vein (Fig. 1N, arrowheads). However, VEGFR3 immunoreactivity was most pronounced in scattered cells lying near the cardinal vein, from where LECs initially sprout (Fig. 1M, arrowheads). To confirm further that the GFP<sup>+</sup>/VEGFR3<sup>+</sup> cells were indeed LECs, a second section was co-stained for the LEC-specific markers VEGFR3 and PROX1 (Fig. 1O). Nuclear anti-PROX1 and cytoplasmic anti-VEGFR3 immunofluorescence co-localized in the same cell population, which was located near the anterior cardinal vein (Fig. 1O, arrowhead). Similarly, GFP-expressing cells were identified in the blood and lymphatic vasculatures of the intestine and the

mesentery (Fig. 1Q), and the skin (data not shown) of a postnatal day 1 (P1) pup. Expression of *Vegfr3* (Fig. 1P), which is restricted to LECs after E14.5, co-localized with a subset of GFP-positive cells (Fig. 1R, arrowhead). Similar results were obtained with PROX1 and LYVE1 immunostaining (data not shown).

We conclude that GATA-2 is a pan-endothelial marker that is expressed early in lymphatic, vascular and endocardial endothelial cells. In the blood vasculature, it is indiscriminately expressed in blood vessels that are formed during vasculogenesis and angiogenesis, as well as in the arterial and venous branches of the embryonic vascular system. In the cardiovascular and lymphatic systems, *Gata2* expression persists postnatally.

### A transgenic YAC recapitulates endogenous *Gata2* expression in the vasculature

We previously reported that a 271 kbp *Gata2* yeast artificial chromosome (YAC) transgene, containing sequences from –198 to +73 kbp (with respect to the translation initiation site) of the *Gata2* locus was capable of rescuing the hematopoietic failure that is the underlying cause of the early embryonic lethality in homozygous *Gata2* mutant embryos (Khandekar et al., 2004; Zhou et al., 1998). When we re-examined the  $\beta$ -galactosidase ( $\beta$ -gal) staining in the developing vasculature of E8.5 transgenic embryos bearing the same (d16) YAC, but tagged with *lacZ* (Zhou et al., 1998), X-gal staining was very prominent in the heart tube (Fig. 2A) and, by E10.5, in the aorta and the endocardium (Fig. 2B). By E12.5, *lacZ* expression was pronounced throughout the vascular system of the yolk sac and in the embryo proper (Fig. 2C–E), although the staining in the umbilical vein appeared to be fainter than in the umbilical artery (Fig. 2E, uv and ua, respectively). This differential staining was reminiscent of the differential GFP intensity of expression observed earlier in the umbilical vein and artery of *Gata2*-GFP knock-in heterozygotes. Furthermore, YAC d18Z (–40 to +73 kbp) – a smaller, 5′-deletion derivative of d16Z (Zhou et al., 1998; Zhou et al., 2000) – displayed an identical vascular *lacZ* pattern in transgenic embryos (data not shown). This led to the tentative conclusion that the regulatory element(s) directing *Gata2* endothelial expression lay within the boundaries of these YACs.

### Localization of a *Gata2* endothelium-specific enhancer

While investigating *Gata2* activity in the developing nervous system previously, we generated the plasmid GR22-*lacZ*, which contains 20 kbp of the *Gata2* genomic sequence (from –9 kbp to slightly

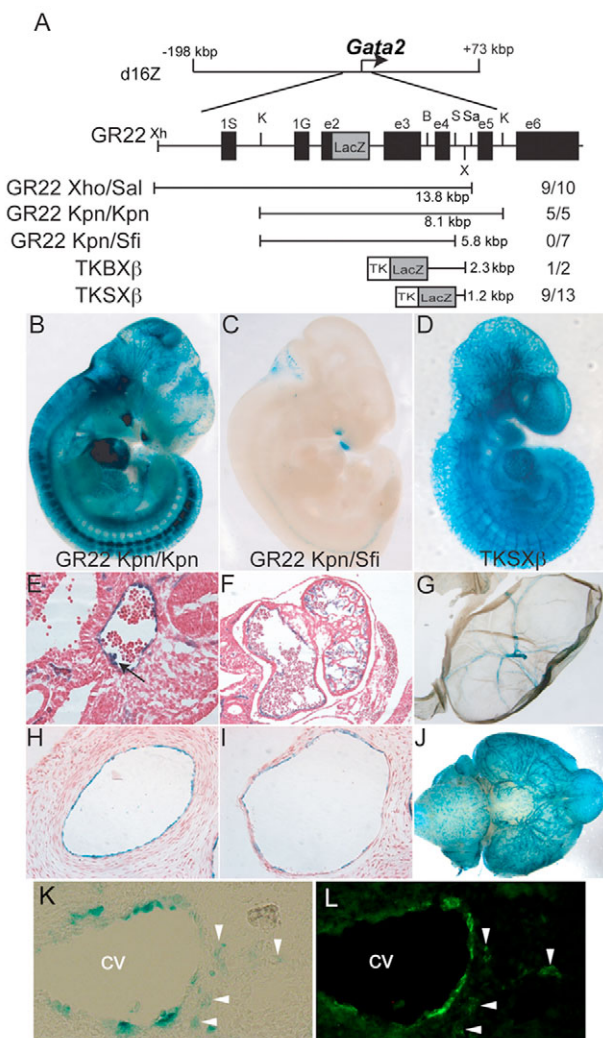

**Fig. 3. Localization of an endothelial enhancer in *Gata2* intron 4.**

(A) Schematic representations of *Gata2* YAC d16Z (Zhou et al., 1998), the *GR22-lacZ* plasmid (Zhou et al., 2000) and *TKβ* expression constructs. The *lacZ* reporter gene (gray box), the *Gata2* coding [exon 2 (e2)-e6; black boxes] and two alternative non-coding first exons (1S and 1G; black boxes) are represented. Overlapping fragments of the *GR22-lacZ* plasmid were excised using different restriction enzymes (*Bam*HI, *B*; *Kpn*II, *K*; *Sal*I, *S*; *Sfi*I, *S*; *Xba*I, *X*; *Xho*I, *Xh*) and were assayed in founder transgenic analyses. The sizes of the *Gata2*-enhancer test fragments are indicated. The numbers on the far right refer to the number of embryos with endothelial staining among the total number of transgene-positive embryos. (B,C) Extensive vascular X-gal staining was observed in representative transgenic embryos generated using the *GR22-lacZ* *XhoI-SalI* (data not shown) or *KpnI-KpnI* fragment (B), but not with the *KpnI-SfiI* fragment (C). (D) A similar *lacZ* expression pattern was reproduced in transgenic embryos generated using *TKBXβ* (not shown) and *TKSXβ* (D). (E-L) Embryos of E10.5 (E-F;K-L), E12.5 (G), E18.5 (H,I) or postnatal (J) gestation ages from a *TKSXβ* stable transgenic line were stained for β-galactosidase activity as cryosectioned (E,F,H,I,K,L) or whole-mount (G,J) specimens. X-gal accumulation was detected in the endothelia lining the dorsal aorta (E), umbilical artery (H) and vein (I); in the endocardium (F); and in the vascular network of the yolk sac (G) and postnatal brain (J). Interestingly, clusters of round *lacZ*-positive cells could be seen budding into the lumen of the dorsal aorta (arrow, E), which is suggestive of early hematopoietic cell formation (see Discussion). (K,L) An anterior transverse embryonic section stained simultaneously for β-galactosidase activity and for the LEC-specific marker LYVE1. Notice that some cells in and around the anterior cardinal vein (cv) stained for both proteins (arrowheads), indicating that the endothelial enhancer is active in LECs as well as in cardiovascular endothelia.

beyond exon 6, with respect to the translational start site) with a *lacZ* reporter gene inserted in frame at the initiation codon in exon 2 (Zhou et al., 2000). Plasmid *GR22-lacZ* was separately digested with different restriction enzymes in order to test, by founder transgenic analysis, overlapping fragments for the presence of an endothelium-specific enhancer. Both *XhoI-SalI* and *KpnI-KpnI* fragments reproduced the same endothelium-restricted activity in the majority of *lacZ* transgene-positive embryos (9/10 and 5/5, respectively; Fig. 3A,B and data not shown) (Zhou et al., 2000). Most instructively, *GR22-lacZ* *KpnI-SfiI* transgenics displaced a complete loss of endothelial X-gal staining (0/7 embryos; Fig. 3C). Hence, the *Gata2* endothelium-specific enhancer activity could be tentatively localized to within a 1.8 kbp *SfiI-SalI* interval in the *Gata2* fourth intron.

Next, we tested various fragments in the *TKβ* vector to assess whether they could function as classical enhancers to drive cardiovascular endothelium-specific expression. When a 2.3 kbp *Bam*HI-*Xba*I (BX) or a 1.2 *Sfi*I-*Xba*I (SX) fragment was tested in transgenic founders, each retained endothelium-specific enhancer activity (Fig. 3D and data not shown). Discrete *lacZ* staining was evident in the endothelial cells lining the aorta and heart (Fig. 3E,F), the blood vessels of the yolk sac (Fig. 3G), the umbilical artery and vein (Fig. 3H,I), and the vascular network of the postnatal brain (Fig. 3J) of *TKSXβ* transgenic animals.

Furthermore, a subset of β-gal<sup>+</sup> cells in and surrounding the anterior cardinal vein (Fig. 3K,L, cv) of an E10.5 *TKSXβ* transgenic embryo stained with the LEC-specific marker LYVE1 (Fig. 3K,L, arrowheads), indicating that the endothelium-specific enhancer is also active in the lymphatic endothelial lineage. Thus, the 1.2 kbp SX fragment was able to function as a classical enhancer and directed *lacZ* expression throughout the entire developing vasculature, recapitulating the full extent of endogenous *Gata2* expression in the endocardial, the blood and the lymphatic vascular systems.

We tested next a series of smaller constructs (Fig. 4A) to establish the boundaries of a minimum enhancer element required to achieve the *Gata2* endothelium-specific expression pattern. Deletion of the 1.2 kbp SX fragment from only the 3' end (in *TKSRβ*) or from both termini (in *TKAAB*) did not alter the cardiovascular endothelium-specific expression in E10.5 transgenic embryos (Fig. 4B,C). By contrast, deletion of the internal *AlwNI-ApaI* (AA) 460 bp fragment from the SX enhancer fragment eliminated all endothelial enhancer activity (0/15; Fig. 4A,D). Thus, the minimal endothelium-specific enhancer as defined by the AA restriction fragment is sufficient for endothelium-specific *Gata2* enhancer activity. Anti-LYVE1 immunostaining of E10.5 *TKAAB* transgenic embryos demonstrated that the minimal endothelium-specific enhancer remained active in LECs (data not shown).



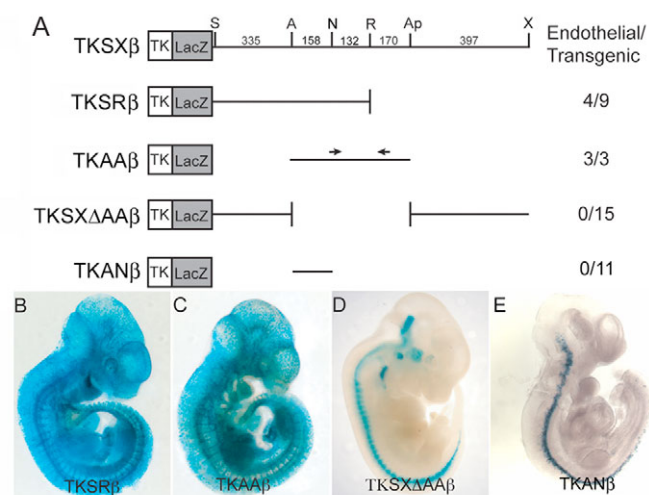

**Fig. 4. Fine localization of the *Gata2* endothelium-specific enhancer.** (A) Schematic illustrations of transgenic constructs (TKXSβ, TKSRβ, TKAAβ, TKSXΔAAβ and TKANβ) used to functionally localize the *Gata2* endothelium-specific enhancer element. Sub-fragments of *Gata2* intron 4 were individually cis-linked to a TK promoter-*lacZ* reporter gene. The positions of relevant restriction enzyme sites (*Alw*NI, *A*; *Ap*l, *Ap*; *N*coI, *N*; *R*srII, *R*; *S*fiI, *S*; *X*baI, *X*) and the restriction fragment lengths (in bp) are indicated. The numbers on the right indicate the number of embryos with cardiovascular β-gal staining/total number of transgene-positive embryos. The arrows represent the positions of the primer pairs used to amplify the 167 bp VE enhancer (see Fig. 5). (B-E) E10.5 embryos bearing TKSRβ (B) or TKAAβ (C) transgenes showed widespread endothelial β-gal staining, whereas the TKSXΔAAβ (D) and TKANβ (E) transgenic embryos were devoid of endothelial X-gal accumulation. In the latter embryos, only ectopic β-gal activity was observed.

### Identification of key regulatory motifs within the *Gata2* minimal endothelium-specific enhancer

Regulatory elements are thought to diverge more slowly than sequences that surround them (Loots et al., 2000). Comparison of the mouse *Gata2* 460 bp endothelium-specific sequence to that of the human sequence demonstrated that a 355 bp region within the AA fragment displayed 92% sequence identity, as well as a nearby 58 bp region that harbored 96% identity (data not shown). This extreme degree of evolutionary sequence conservation strongly implies an associated functional significance. Analysis of the 460 bp element using MatInspector 2.2 (Quandt et al., 1995), which uses the consensus transcription factor-binding motifs from the TRANSFAC database, identified a number of candidate regulatory molecules that might bind to this enhancer (Fig. 5A). A closer examination of this restriction fragment showed an unusual clustering of binding sites within a central 167 bp core region (as delineated by the two convergent arrows shown in Fig. 4A and Fig. 5A). Interestingly, the 3' terminus of this region corresponded closely to the *Rsr*II site that was identified previously as defining the 3' functional boundary of endothelium-specific activity (Fig. 4A,B).

The mouse 167 bp endothelium-specific fragment (called VE) bearing the highest human-mouse identity was cloned into TKβ to test its ability to recapitulate endothelial expression. Analysis of transgenic founders showed that TKVEβ was able to confer endothelial expression in a range of vascular tissue (14/17; Fig. 5B) that did not differ from the TKAAβ construct. Strikingly, however, none of these embryos (0/17) exhibited endocardium-specific β-gal

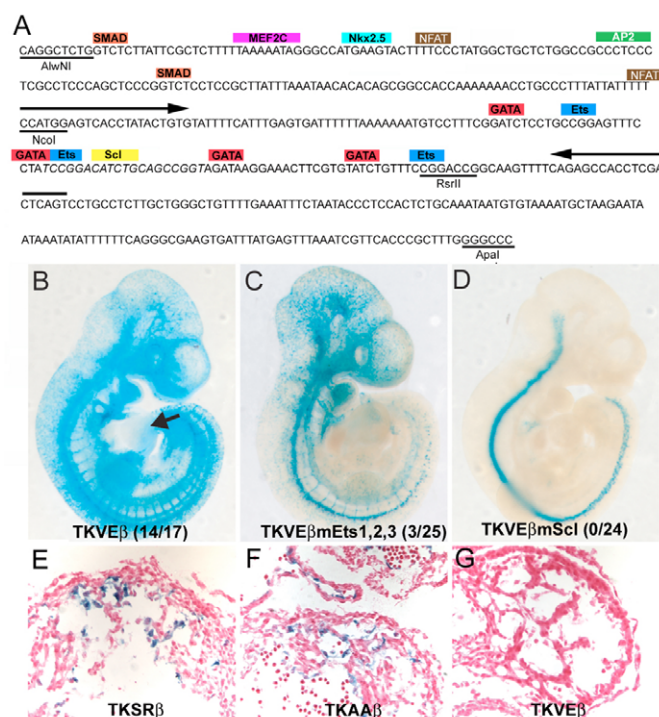

**Fig. 5. Identification of a crucial E box for *Gata2* vascular endothelium enhancer activity.** (A) Consensus binding motifs for candidate regulatory effectors within the evolutionarily conserved 460 bp *Alw*NI-*Ap*l endothelium-specific enhancer sequence are highlighted. The 167 bp minimal vascular endothelium-specific (VE) enhancer in TKVEβ (B) was generated using the PCR primer pairs indicated by the two convergent arrows. The italicized sequences correspond to the radiolabeled probe used for EMSA studies (see Fig. 6). (B) TKVEβ recapitulates widespread vascular (14/17), but not endocardial (0/17, arrow), endothelial *lacZ* expression in E10.5 transgenic embryos. (C) Simultaneous mutation of all three ETS1-binding consensus sites (A) in TKVEβmEts1,2,3 resulted in far fewer (3/25) transgenic embryos that displayed vascular endothelium-specific *lacZ* expression. (D) Disruption of the single SCL-binding site (A) in TKVEβmScl completely abrogated vascular endothelium-specific X-gal accumulation (0/24). (E-G) Transverse sections through the hearts of E10.5 embryos bearing TKSRβ (E; Fig. 4B), TKAAβ (F; Fig. 4C) or TKVEβ (G; Fig. 5B) transgenes. Notice the conspicuous absence of X-gal staining in the endocardium of the ventricular chamber of the TKVEβ embryo.

staining (Fig. 5B, arrow). We surmise from these data, in conjunction with data presented earlier (Fig. 4), that the endothelium-specific activity is largely contained within the 290 bp *Alw*NI-*Rsr*II fragment of *Gata2* intron 4 and that the 5'-most 155 bp of the *Alw*NI-*Rsr*II fragment are required for *Gata2* expression in the endocardium while the adjoining 3' 167 bp can autonomously direct transgene expression in blood endothelia (Fig. 4A and Fig. 5A). Examination of the former sequences revealed the presence of consensus binding sites for the NFAT, Nkx2.5 (also known as Nkx2-5), SMAD, AP2 (also known as Tcfap2a) and MEF2C transcription factors, some of which have been shown previously to directly regulate endocardial enhancers and to be involved in regulating endocardial differentiation (Nemer and Nemer, 2002; Zhou et al., 2005). Whether or not these serve as bona fide binding motifs for any of these factors, and determination of the underlying mechanism via which they contribute to endocardial endothelial development, will require further investigation.

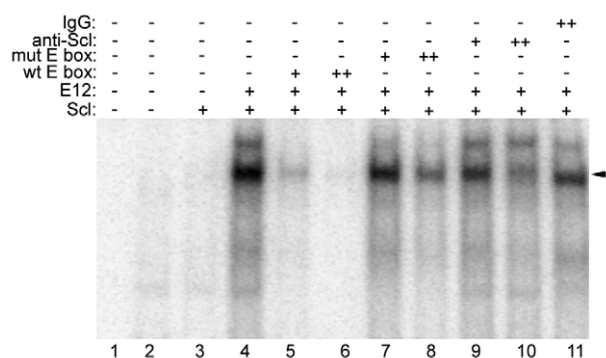

**Fig. 6. An SCL-E12 complex binds specifically to the *Gata2* VE-enhancer E box.** No extract (lane 1) or nuclear extracts from 293T cells, which were mock transfected (lane 2), transfected with SCL alone (lane 3) or with SCL plus E12 expression plasmids (lanes 4–11), were incubated with radiolabeled E box oligonucleotide probe. To demonstrate binding specificity, unlabeled competitors (20- or 200-fold excess) containing wild-type (wt; lanes 5,6) or mutant (mut; lanes 7,8) E box, anti-SCL antibody (1 or 3  $\mu$ l; lanes 9,10) or control mouse IgG (lane 11) were added to separate binding reactions. Formation of a lower-mobility complex was observed only when both SCL and E12 were present in the extract and was specifically disrupted by wild-type, but not mutant, competitors as well as by the addition of an anti-SCL antibody.

To ascertain whether the 5′-most 155 bp fragment was sufficient for endocardium-specific reporter gene activation, we tested the *AlwNI-NcoI* fragment in the context of TK $\beta$  (Fig. 4A), and found that, of 11 recovered transgenic embryos, none displayed endocardial X-gal staining despite exhibiting variably ectopic X-gal staining (Fig. 4A,E). We conclude that the 5′-most 155 bp of the endothelium-specific enhancer alone is incapable of independently directing *Gata2* endocardium expression.

The Ets family of transcription factors have been shown to play crucial roles in vascular development (Ayadi et al., 2001; Wang et al., 1997), and have also been reported to play prominent roles in endothelium-specific enhancer activity (Gottgens et al., 2002; Kappel et al., 2000). The existence of three ETS-binding sites within the 167 bp *Gata2* VE enhancer suggested that one or multiple Ets family members might modulate its activity. To directly address this hypothesis, the three ETS-binding sites were individually mutated from CGGA to CGcg, a mutation that was previously shown to eliminate ETS-factor binding (O'Reilly et al., 2003). Mutation of either two or all three ETS-binding sites reduced the overall number of embryos displaying weak, albeit endothelium-specific, staining (1/12 and 3/25, respectively; data not shown and Fig. 5C).

Next we determined whether the single E box motif present in the 167 bp VE enhancer is important for its overall activity. A mutation (5′-CATCTG-3′ to 5′-CAccG-3′) that was previously shown to eliminate SCL binding (Kappel et al., 2000) was incorporated into the TKVE $\beta$  plasmid. Among the 24 recovered TKVE $\beta$ mScl transgenic embryos, none displayed endothelial  $\beta$ -gal staining (e.g. Fig. 5D). This lack of staining was presumably not due to the effect of transgene integration site, because some of the transgenic embryos (9/24) exhibited ectopic staining in the spinal cord or head. These data demonstrate that the single *Gata2* intron 4 E box exerts a profound effect on the activity of the VE enhancer and, by extension, in the regulation of *Gata2* expression throughout the blood endothelium.

### An SCL-E12 heterodimer avidly binds to the E box motif in the *Gata2* VE enhancer

Because SCL had been shown previously to be essential for endothelial differentiation (Visvader et al., 1998), we wished to determine whether SCL could bind to the E box in the VE fragment. To do so, we performed electrophoretic mobility shift assays (EMSAs) using nuclear extracts from 293T cells transfected with either SCL, or SCL plus E12, expression vectors. Incubation of radiolabeled E box oligonucleotide probes with nuclear extracts containing SCL-E12, but not SCL alone, resulted in a low-mobility complex (Fig. 6, lane 4), which could be specifically competed by the addition of an excess of unlabeled E box oligonucleotide (Fig. 6, lanes 5,6), but not by mutant E box oligonucleotide (Fig. 6, lanes 7,8). The binding specificity and protein identity were confirmed by showing that addition of an anti-SCL antibody (Fig. 6, lanes 9,10), but not control IgG (Fig. 6, lane 11), significantly reduced EMSA complex formation. Thus, the crucial E box motif in the *Gata2* VE enhancer can be strongly bound by the basic helix-loop-helix transcription factor SCL.

### DISCUSSION

In summary, the data presented here delimit the boundaries of a functionally defined 460 bp *Gata2* fourth intron endothelium-specific enhancer element that is capable of autonomously directing reporter gene expression in vivo in vascular, endocardial and lymphatic endothelial cells, thus precisely mimicking endogenous GATA-2 expression. Given the paucity of molecular markers and tools unique to the LEC lineage, the *Gata2* endothelium-specific enhancer may serve as a useful additional marker in the lymphatic field. Both ETS- and E box-binding sites contribute to the potency of the VE enhancer, thus implicating Ets family member(s) and SCL as candidate regulatory effectors of *Gata2* vascular endothelial expression.

### Identification of *Gata2* pan-endothelium-specific enhancer

The existence of an endothelial enhancer for *Gata2* raises several intriguing questions about its function. Earlier genetic data indicated that GATA-2 plays a crucial role in early hematopoietic development (Tsai et al., 1994) and is indeed capable of specifically marking hematopoietic stem cells (Suzuki et al., 2006). Given that the earliest hemangiogenic cells are closely related to the endothelial lineage (Choi et al., 1998), one might speculate that this endothelial enhancer could also target a subset of hematopoietic cells that are generated from the aortic endothelium. Suggestively, we identified *lacZ*-positive cells that appear to be ‘budding’ from the aortic wall (Fig. 3E, arrow). Whether these cells are bona fide hematopoietic cells or simply endothelial cells being sloughed into the aorta is yet to be determined. However, the existence of an endothelium-specific enhancer of *Scl*, which also marks hematopoietic progenitors (Gottgens et al., 2004), suggests that the *Gata2* intron 4 enhancer identified here may play some role in the appropriate regulation of *Gata2* in hematopoietic progenitors as well, particularly in light of the recent observation that this enhancer is active in definitive erythroid cells (Grass et al., 2006) (see below).

We report here that *Gata2* is also expressed at the earliest stage of lymphangiogenesis, when LECs bud from the anterior cardinal veins at mid-gestation, and that it continues to be expressed in the postnatal lymphatic vasculature. Although the initial budding of PROX1<sup>+</sup> LECs appeared to be normal in GATA-2-deficient embryos (data not shown), it remains to be determined whether lymphatic development after E10, the nominal time of death of *Gata2*-null embryos, continues unperturbed.

In the blood vasculature, the lack of any reported phenotype in *Gata2*<sup>-/-</sup> embryos led to the initial conclusion that functional redundancy of other GATA family members, including GATA-4 and GATA-6, may compensate for any lack of GATA-2 in the endothelium. Another equally plausible possibility is that *Gata2* mutant embryos simply die too early (~E10) (Tsai et al., 1994) to generate a robust vascular phenotype. Based on the analysis of *Gata3-lacZ* knock-in mice, *Gata3* expression in the endothelium does not appear to be widespread, but this closely related GATA family member does seem to be sporadically active (our unpublished data). *Gata4*, which plays a crucial role in heart development, does not appear to be expressed in mature endothelial cells (Umetani et al., 2001), although it is expressed in endothelial progenitors (Hatzopoulos et al., 1998). *Gata6* is expressed in both endothelial precursors as well as in mature endothelial cells (Hatzopoulos et al., 1998; Umetani et al., 2001), making GATA-6 a prime candidate for a possible *Gata2*-complementing endothelium activity. Whereas *Gata4* and *Gata6* heterozygotes are normal, compound heterozygotes display cardiovascular defects (Xin et al., 2006). Notably, these embryos displayed a less intricate weave, which was disorganized, of the cranial and intersomitic vasculature, as well as hemorrhaging. The recent generation of a *Gata6* conditional loss-of-function allele (Sodhi et al., 2006) should now permit exploration of cell autonomous GATA-6 involvement, if any, in endothelial development.

### Role of Ets family transcription factors in *Gata2* endothelium-specific enhancer activity

Within an initial functionally defined restriction fragment describing the *Gata2* endothelial enhancer, we subsequently identified a 167 bp core enhancer that was sufficient to recapitulate vascular endothelial expression. The existence of three putative Ets family-member-binding sites implicated a role for these factors in the control of this VE enhancer. The Ets family of transcription factors have been shown to play an important role in vascular development in vivo (Sumanas and Lin, 2006) and have been shown to be functionally important in the activation of a number of endothelial-specific enhancers, including *Scl* (Gottgens et al., 2004), *Tie2* (also known as *Tek*) (Minami et al., 2003) and *Flk1* (also known as *Kdr*) (Elvert et al., 2003). Furthermore, disruption of *Tel* (also known as *Etv6*), one Ets family member, results in defective yolk sac angiogenesis (Wang et al., 1997), suggesting that TEL plays an important role in vascular remodeling. However, targeted mutation of other ETS factors has not revealed vascular deficiencies, suggesting that these factors may either play no role or may also be functionally redundant in endothelium development.

In the *Gata2* VE enhancer defined here, mutations predicted to disrupt ETS-binding sites significantly attenuated enhancer activity, as indicated by the number of, and X-gal-staining intensity in, transgenic embryos displaying endothelial  $\beta$ -gal staining. However, the weak staining pattern detected in these embryos appeared to remain endothelium-specific, indicating that the ETS-binding sites are not essential for the tissue specificity of the enhancer, but rather may serve to augment its overall potency. Because this cis mutation has been shown in a similar assay to eliminate DNA binding for some members of the family (O'Reilly et al., 2003), we cannot rule out the possibility that the mutation does not abolish the binding of the multiple Ets family members that are expressed within the endothelium (Lelievre et al., 2001). Additionally, the heterogeneity of ETS-binding sites suggests that some family members may be able to bind to other sequences within the enhancer, enabling endothelial activation despite mutations within canonical high-affinity binding sites.

### An E box-binding factor is required for *Gata2* endothelial enhancer activity

The transcription factor SCL has been shown to play crucial roles in both hematopoiesis (Shivdasani et al., 1995) and vascular development (Patterson et al., 2005; Visvader et al., 1998), leading to the speculation that SCL may be important for the ontogeny of the hemangioblast. A comprehensive analysis of the transcriptional regulation of *Scl* has identified several tissue-specific enhancers that are required for its appropriate expression (Barton et al., 2001; Gottgens et al., 2002; Sinclair et al., 1999). Interestingly, the enhancer specific for hematopoietic progenitors has GATA sites that are crucial for *Scl* enhancer activity in vivo. The factor responsible for binding to these sites in hematopoietic cell lines appears to be GATA-2, suggesting that GATA-2 is responsible for activating *Scl* in early hematopoiesis. However, there is no GATA-binding site in the endothelial enhancer of human *SCL*, although it remains possible that a GATA factor is acting without directly binding to DNA (Gottgens et al., 2004). The data presented here are consistent with the possibility that *Gata2* and *Scl* encode reciprocally reinforcing activators in these developmentally related tissues, although other interpretations are clearly not excluded from the data presented.

To assess the relationship between *Scl* and *Gata2* in the endothelium, we mutated the single E box present within the 167 bp *Gata2* VE enhancer. *Scl* has previously been shown to be regulated by GATA factors in both the CNS (Sinclair et al., 1999) and hematopoietic progenitors (Gottgens et al., 2002), suggesting that the nature of the epistatic relationship between these two factors may be dependent on the specific tissue in question. However, these data also underscore the point that the functions of these two factors are often intimately intertwined during development. Lending further credence to this point is the evidence that *Scl* expression in the endothelium is crucially dependent on Ets-family activity (Gottgens et al., 2004). The endothelial enhancer of *Scl* contains five ETS-binding sites that are required for the activity of the enhancer in trans-activation assays. Given that both *Scl* and *Gata2* appear to be regulated by ETS factors in the endothelium, we surmise that ETS, SCL and GATA-2 together constitute a regulatory circuitry wherein, in the simplest scenario envisaged, ETS factors activate *Scl*, and ETS and SCL then cooperate to activate *Gata2* in endothelial cells. Similarly, the data are also consistent with the possibility that Ets family members collaborate with GATA-2 to reinforce *Scl* expression in a positive-feedback loop.

The similarities between the regulation of *Scl* and *Gata2* are also underscored by the similarity of their functions in the hematopoietic system. Targeted mutation of both genes results in defects in both primitive and definitive hematopoiesis, resulting in mid-gestational lethality (Shivdasani et al., 1995; Tsai et al., 1994). This phenotypic similarity has not been demonstrated in the vascular system, where SCL has been shown to play a prominent role in vascular remodeling, whereas GATA-2 has not. However, because the vascular defects in *Scl*-null mutants were only revealed after selective rescue of hematopoiesis, it seems likely that the early lethality of *Gata2*-null mice precludes a more precise analysis of the function of GATA-2 in the vascular system. Experiments are underway to circumvent the embryonic hematopoietic lethality and explore possible functions of GATA-2 in the vasculature.

The presence of multiple GATA-binding motifs within the VE enhancer also raises the issue of whether this enhancer might be auto-regulated by GATA-2, or even by another GATA factor. Of specific interest here, Grass et al. recently identified this same



element through its evolutionary sequence conservation during an analysis of GATA-1 regulation of the *Gata2* gene in erythroid cells (Grass et al., 2006). In that study, the authors demonstrated that sequences overlapping the VE element exhibited robust activity in transfected erythroid cells and that elimination of the GATA sites abrogated the erythroid enhancer activity. Here, we show that the VE element is at least equally as active and as specific for endothelial cells in a rigorous in vivo assay. Whether the activity identified by Grass et al. and the activity we defined here represents an endothelial-enhancer activity that can simply be surreptitiously activated in erythroid cells or whether the element represents one that can be a bona fide target for GATA-factor activation in both hematopoietic and endothelial cells (as one might imagine for a hemangioblast-responsive element) awaits resolution following further investigation.

We thank Weimin Song, Misti Thompson and Xia Jiang for outstanding technical assistance; and members of the Engel laboratory for helpful advice and stimulating discussion. This work was supported by a Northwestern University Medical Scientist Training Program Fellowship (M.K.); by a University of Michigan Cell and Molecular Biology NIH Traineeship (W.B.); and by research grants from the NIH (GM28896, J.D.E. and HL71206, T.W.G.).

## References

- Ayadi, A., Zheng, H., Sobieszczyk, P., Buchwalter, G., Moerman, P., Alitalo, K. and Wasylyk, B. (2001). Net-targeted mutant mice develop a vascular phenotype and up-regulate *egr-1*. *EMBO J.* **20**, 5139-5152.
- Barton, L. M., Gottgens, B., Gering, M., Gilbert, J. G., Grafham, D., Rogers, J., Bentley, D., Patient, R. and Green, A. R. (2001). Regulation of the stem cell leukemia (SCL) gene: a tale of two fishes. *Proc. Natl. Acad. Sci. USA* **98**, 6747-6752.
- Briegleb, K., Lim, K. C., Plank, C., Beug, H., Engel, J. D. and Zenke, M. (1993). Ectopic expression of a conditional GATA-2/estrogen receptor chimera arrests erythroid differentiation in a hormone-dependent manner. *Genes Dev.* **7**, 1097-1109.
- Choi, K., Kennedy, M., Kazarov, A., Papadimitriou, J. C. and Keller, G. (1998). A common precursor for hematopoietic and endothelial cells. *Development* **125**, 725-732.
- Cowan, P. J., Tsang, D., Pedic, C. M., Abbott, L. R., Shinkel, T. A., d'Apice, A. J. and Pearce, M. J. (1998). The human ICAM-2 promoter is endothelial cell-specific in vitro and in vivo and contains critical Sp1 and GATA binding sites. *J. Biol. Chem.* **273**, 11737-11744.
- de Bruijn, M. F., Ma, X., Robin, C., Ottersbach, K., Sanchez, M. J. and Dzierzak, E. (2002). Hematopoietic stem cells localize to the endothelial cell layer in the midgestation mouse aorta. *Immunity* **16**, 673-683.
- Dorfman, D. M., Wilson, D. B., Bruns, G. A. and Orkin, S. H. (1992). Human transcription factor GATA-2. Evidence for regulation of preproendothelin-1 gene expression in endothelial cells. *J. Biol. Chem.* **267**, 1279-1285.
- Elvert, G., Kappel, A., Heidenreich, R., Englmeier, U., Lanz, S., Acker, T., Rauter, M., Plate, K., Sieweke, M., Breier, G. et al. (2003). Cooperative interaction of hypoxia-inducible factor-2alpha (HIF-2alpha) and Ets-1 in the transcriptional activation of vascular endothelial growth factor receptor-2 (Flk-1). *J. Biol. Chem.* **278**, 7520-7530.
- Fang, J., Dagenais, S. L., Erickson, R. P., Arlt, M. F., Glynn, M. W., Gorski, J. L., Seaver, L. H. and Glover, T. W. (2000). Mutations in FOXC2 (MFH-1), a forkhead family transcription factor, are responsible for the hereditary lymphedema-distichiasis syndrome. *Am. J. Hum. Genet.* **67**, 1382-1388.
- German, Z., Chambliss, K. L., Pace, M. C., Arnet, U. A., Lowenstein, C. J. and Shaul, P. W. (2000). Molecular basis of cell-specific endothelial nitric-oxide synthase expression in airway epithelium. *J. Biol. Chem.* **275**, 8183-8189.
- Gottgens, B., Nastos, A., Kinston, S., Piltz, S., Delabesse, E. C., Stanley, M., Sanchez, M. J., Cia-Uitz, A., Patient, R. and Green, A. R. (2002). Establishing the transcriptional programme for blood: the SCL stem cell enhancer is regulated by a multiprotein complex containing Ets and GATA factors. *EMBO J.* **21**, 3039-3050.
- Gottgens, B., Broccardo, C., Sanchez, M. J., Deveaux, S., Murphy, G., Gothert, D. R., Kotsopoulou, E., Kinston, S., Delaney, L., Piltz, S. et al. (2004). The *scl* +18/19 stem cell enhancer is not required for hematopoiesis: identification of a 5' bifunctional hematopoietic-endothelial enhancer bound by Fli-1 and Elf-1. *Mol. Cell. Biol.* **24**, 1870-1883.
- Grass, J. A., Jing, H., Kim, S. I., Martowicz, M. L., Pal, S., Blobel, G. A. and Bresnick, E. H. (2006). Distinct functions of dispersed GATA factor complexes at an endogenous gene locus. *Mol. Cell. Biol.* **26**, 7056-7067.
- Gumina, R. J., Kirschbaum, N. E., Piotrowski, K. and Newman, P. J. (1997). Characterization of the human platelet/endothelial cell adhesion molecule-1 promoter: identification of a GATA-2 binding element required for optimal transcriptional activity. *Blood* **89**, 1260-1269.
- Hatzopoulos, A. K., Folkman, J., Vasilis, E., Eiselen, G. K. and Rosenberg, R. D. (1998). Isolation and characterization of endothelial progenitor cells from mouse embryos. *Development* **125**, 1457-1468.
- Irrthum, A., Devriendt, K., Chitayat, D., Matthijs, G., Glade, C., Steijlen, P. M., Fryns, J. P., Van Steensel, M. A. and Vikkula, M. (2003). Mutations in the transcription factor gene SOX18 underlie recessive and dominant forms of hypotrichosis-lymphedema-telangiectasia. *Am. J. Hum. Genet.* **72**, 1470-1478.
- Kaipainen, A., Korhonen, J., Mustonen, T., van Hinsbergh, V. W., Fang, G. H., Dumont, D., Breitman, M. and Alitalo, K. (1995). Expression of the *fms*-like tyrosine kinase 4 gene becomes restricted to lymphatic endothelium during development. *Proc. Natl. Acad. Sci. USA* **92**, 3566-3570.
- Kappel, A., Schlaeger, T. M., Flamme, I., Orkin, S. H., Risau, W. and Breier, G. (2000). Role of SCL/Tal-1, GATA, and ets transcription factor binding sites for the regulation of flk-1 expression during murine vascular development. *Blood* **96**, 3078-3085.
- Karkkainen, M. J., Ferrell, R. E., Lawrence, E. C., Kimak, M. A., Levinson, K. L., McTigue, M. A., Alitalo, K. and Finegold, D. N. (2000). Missense mutations interfere with VEGFR-3 signalling in primary lymphoedema. *Nat. Genet.* **25**, 153-159.
- Karkkainen, M. J., Haiko, P., Sainio, K., Partanen, J., Taipale, J., Petrova, T. V., Jeltsch, M., Jackson, D. G., Talikka, M., Rauvala, H. et al. (2004). Vascular endothelial growth factor C is required for sprouting of the first lymphatic vessels from embryonic veins. *Nat. Immunol.* **5**, 74-80.
- Khandekar, M., Suzuki, N., Lewton, J., Yamamoto, M. and Engel, J. D. (2004). Multiple, distant Gata2 enhancers specify temporally and tissue-specific patterning in the developing urogenital system. *Mol. Cell. Biol.* **24**, 10263-10276.
- Kitajima, K., Masuhara, M., Era, T., Enver, T. and Nakano, T. (2002). GATA-2 and GATA-2/ER display opposing activities in the development and differentiation of blood progenitors. *EMBO J.* **21**, 3060-3069.
- Lazrak, M., Deleuze, V., Noel, D., Haouzi, D., Chalhoub, E., Dohet, C., Robbins, I. and Mathieu, D. (2004). The bHLH TAL-1/SCL regulates endothelial cell migration and morphogenesis. *J. Cell Sci.* **117**, 1161-1171.
- Lelievre, E., Lionneton, F., Soncin, F. and Vandenbunder, B. (2001). The Ets family contains transcriptional activators and repressors involved in angiogenesis. *Int. J. Biochem. Cell Biol.* **33**, 391-407.
- Liao, E. C., Paw, B. H., Oates, A. C., Pratt, S. J., Postlethwait, J. H. and Zon, L. I. (1998). SCL/Tal-1 transcription factor acts downstream of cloche to specify hematopoietic and vascular progenitors in zebrafish. *Genes Dev.* **12**, 621-626.
- Loots, G. G., Locksley, R. M., Blankespoor, C. M., Wang, Z. E., Miller, W., Rubin, E. M. and Frazer, K. A. (2000). Identification of a coordinate regulator of interleukins 4, 13, and 5 by cross-species sequence comparisons. *Science* **288**, 136-140.
- Minami, T., Kuivenhoven, J. A., Evans, V., Kodama, T., Rosenberg, R. D. and Aird, W. C. (2003). Ets motifs are necessary for endothelial cell-specific expression of a 723-bp Tie-2 promoter/enhancer in Hprt targeted transgenic mice. *Arterioscler. Thromb. Vasc. Biol.* **23**, 2041-2047.
- Minami, T., Murakami, T., Horiuchi, K., Miura, M., Noguchi, T., Miyazaki, J., Hamakubo, T., Aird, W. C. and Kodama, T. (2004). Interaction between hex and GATA transcription factors in vascular endothelial cells inhibits flk-1/KDR-mediated vascular endothelial growth factor signaling. *J. Biol. Chem.* **279**, 20626-20635.
- Molkentin, J. D. (2000). The zinc finger-containing transcription factors GATA-4, -5, and -6. Ubiquitously expressed regulators of tissue-specific gene expression. *J. Biol. Chem.* **275**, 38949-38952.
- Molkentin, J. D., Lin, Q., Duncan, S. A. and Olson, E. N. (1997). Requirement of the transcription factor GATA4 for heart tube formation and ventral morphogenesis. *Genes Dev.* **11**, 1061-1072.
- Molkentin, J. D., Tymitz, K. M., Richardson, J. A. and Olson, E. N. (2000). Abnormalities of the genitourinary tract in female mice lacking GATA5. *Mol. Cell. Biol.* **20**, 5256-5260.
- Morrissey, E. E., Tang, Z., Sigrist, K., Lu, M. M., Jiang, F., Ip, H. S. and Parmacek, M. S. (1998). GATA6 regulates HNF4 and is required for differentiation of visceral endoderm in the mouse embryo. *Genes Dev.* **12**, 3579-3590.
- Nemer, G. and Nemer, M. (2002). Cooperative interaction between GATA5 and NF-ATc regulates endothelial-endocardial differentiation of cardiogenic cells. *Development* **129**, 4045-4055.
- O'Reilly, D., Quinn, C. M., El-Shanawany, T., Gordon, S. and Greaves, D. R. (2003). Multiple Ets factors and interferon regulatory factor-4 modulate CD68 expression in a cell type-specific manner. *J. Biol. Chem.* **278**, 21909-21919.
- Oliver, G. (2004). Lymphatic vasculature development. *Nat. Rev. Immunol.* **4**, 35-45.
- Oliver, G. and Alitalo, K. (2005). The lymphatic vasculature: recent progress and paradigms. *Annu. Rev. Cell Dev. Biol.* **21**, 457-483.
- Pandolfi, P. P., Roth, M. E., Karis, A., Leonard, M. W., Dzierzak, E., Grosfeld, F. G., Engel, J. D. and Lindenbaum, M. H. (1995). Targeted disruption of the

- GATA3 gene causes severe abnormalities in the nervous system and in fetal liver haematopoiesis. *Nat. Genet.* **11**, 40-44.
- Patterson, L. J., Gering, M. and Patient, R. (2005). Scl is required for dorsal aorta as well as blood formation in zebrafish embryos. *Blood* **105**, 3502-3511.
- Petrova, T. V., Karpanen, T., Norrmén, C., Mellor, R., Tamakoshi, T., Finegold, D., Ferrell, R., Kerjaschki, D., Mortimer, P., Yla-Herttuala, S. et al. (2004). Defective valves and abnormal mural cell recruitment underlie lymphatic vascular failure in lymphedema distichiasis. *Nat. Med.* **10**, 974-981.
- Pevny, L., Lin, C. S., D'Agati, V., Simon, M. C., Orkin, S. H. and Costantini, F. (1995). Development of hematopoietic cells lacking transcription factor GATA-1. *Development* **121**, 163-172.
- Quandt, K., Frech, K., Karas, H., Wingender, E. and Werner, T. (1995). MatInd and MatInspector: new fast and versatile tools for detection of consensus matches in nucleotide sequence data. *Nucleic Acids Res.* **23**, 4878-4884.
- Risau, W. (1997). Mechanisms of angiogenesis. *Nature* **386**, 671-674.
- Robb, L., Lyons, I., Li, R., Hartley, L., Kontgen, F., Harvey, R. P., Metcalf, D. and Begley, C. G. (1995). Absence of yolk sac hematopoiesis from mice with a targeted disruption of the scl gene. *Proc. Natl. Acad. Sci. USA* **92**, 7075-7079.
- Rodriguez, P., Bonte, E., Krijgsvelde, J., Kolodziej, K. E., Guyot, B., Heck, A. J., Vyas, P., de Boer, E., Grosveld, F. and Strouboulis, J. (2005). GATA-1 forms distinct activating and repressive complexes in erythroid cells. *EMBO J.* **24**, 2354-2366.
- Sabin, F. R. (1902). On the origin of the lymphatic system from the veins, and the development of the lymph hearts and thoracic duct in the pig. *Am. J. Anat.* **1**, 367-389.
- Sabin, F. R. (1904). On the development of the superficial lymphatics in the skin of the pig. *Am. J. Anat.* **3**, 183-189.
- Shivdasani, R. A., Mayer, E. L. and Orkin, S. H. (1995). Absence of blood formation in mice lacking the T-cell leukaemia oncoprotein tal-1/SCL. *Nature* **373**, 432-434.
- Sinclair, A. M., Gottgens, B., Barton, L. M., Stanley, M. L., Pardanaud, L., Klaine, M., Gering, M., Bahn, S., Sanchez, M., Bench, A. J. et al. (1999). Distinct 5' SCL enhancers direct transcription to developing brain, spinal cord, and endothelium: neural expression is mediated by GATA factor binding sites. *Dev. Biol.* **209**, 128-142.
- Sodhi, C. P., Li, J. and Duncan, S. A. (2006). Generation of mice harbouring a conditional loss-of-function allele of Gata6. *BMC Dev. Biol.* **6**, 19.
- Stainier, D. Y., Weinstein, B. M., Detrich, H. W., 3rd, Zon, L. I. and Fishman, M. C. (1995). Cloche, an early acting zebrafish gene, is required by both the endothelial and hematopoietic lineages. *Development* **121**, 3141-3150.
- Sumanas, S. and Lin, S. (2006). Ets1-related protein is a key regulator of vasculogenesis in zebrafish. *PLoS Biol.* **4**, e10.
- Suzuki, N., Ohneda, O., Minegishi, N., Nishikawa, M., Ohta, T., Takahashi, S., Engel, J. D. and Yamamoto, M. (2006). Combinatorial Gata2 and Sca1 expression defines hematopoietic stem cells in the bone marrow niche. *Proc. Natl. Acad. Sci. USA* **103**, 2202-2207.
- Tanimoto, K., Liu, Q., Grosveld, F., Bungert, J. and Engel, J. D. (2000). Context-dependent EKLF responsiveness defines the developmental specificity of the human epsilon-globin gene in erythroid cells of YAC transgenic mice. *Genes Dev.* **14**, 2778-2794.
- Tsai, F. Y. and Orkin, S. H. (1997). Transcription factor GATA-2 is required for proliferation/survival of early hematopoietic cells and mast cell formation, but not for erythroid and myeloid terminal differentiation. *Blood* **89**, 3636-3643.
- Tsai, F. Y., Keller, G., Kuo, F. C., Weiss, M., Chen, J., Rosenblatt, M., Alt, F. W. and Orkin, S. H. (1994). An early haematopoietic defect in mice lacking the transcription factor GATA-2. *Nature* **371**, 221-226.
- Umetani, M., Mataka, C., Minegishi, N., Yamamoto, M., Hamakubo, T. and Kodama, T. (2001). Function of GATA transcription factors in induction of endothelial vascular cell adhesion molecule-1 by tumor necrosis factor-alpha. *Arterioscler. Thromb. Vasc. Biol.* **21**, 917-922.
- Visvader, J. E., Fujiwara, Y. and Orkin, S. H. (1998). Unsuspected role for the T-cell leukemia protein SCL/tal-1 in vascular development. *Genes Dev.* **12**, 473-479.
- Wang, L. C., Kuo, F., Fujiwara, Y., Gilliland, D. G., Golub, T. R. and Orkin, S. H. (1997). Yolk sac angiogenic defect and intra-embryonic apoptosis in mice lacking the Ets-related factor TEL. *EMBO J.* **16**, 4374-4383.
- Wang, Q., Stacy, T., Binder, M., Marin-Padilla, M., Sharpe, A. H. and Speck, N. A. (1996). Disruption of the Cbfa2 gene causes necrosis and hemorrhaging in the central nervous system and blocks definitive hematopoiesis. *Proc. Natl. Acad. Sci. USA* **93**, 3444-3449.
- Warren, A. J., Colledge, W. H., Carlton, M. B., Evans, M. J., Smith, A. J. and Rabbitts, T. H. (1994). The oncogenic cysteine-rich LIM domain protein rbt2 is essential for erythroid development. *Cell* **78**, 45-57.
- Wigle, J. T. and Oliver, G. (1999). Prox1 function is required for the development of the murine lymphatic system. *Cell* **98**, 769-778.
- Wigle, J. T., Harvey, N., Detmar, M., Lagutina, I., Grosveld, G., Gunn, M. D., Jackson, D. G. and Oliver, G. (2002). An essential role for Prox1 in the induction of the lymphatic endothelial cell phenotype. *EMBO J.* **21**, 1505-1513.
- Xin, M., Davis, C. A., Molkentin, J. D., Lien, C. L., Duncan, S. A., Richardson, J. A. and Olson, E. N. (2006). A threshold of GATA4 and GATA6 expression is required for cardiovascular development. *Proc. Natl. Acad. Sci. USA* **103**, 11189-11194.
- Yamada, Y., Pannell, R., Forster, A. and Rabbitts, T. H. (2000). The oncogenic LIM-only transcription factor Lmo2 regulates angiogenesis but not vasculogenesis in mice. *Proc. Natl. Acad. Sci. USA* **97**, 320-324.
- Yamamoto, M., Ko, L. J., Leonard, M. W., Beug, H., Orkin, S. H. and Engel, J. D. (1990). Activity and tissue-specific expression of the transcription factor NF-E1 multigene family. *Genes Dev.* **4**, 1650-1662.
- Yamashita, K., Discher, D. J., Hu, J., Bishopric, N. H. and Webster, K. A. (2001). Molecular regulation of the endothelin-1 gene by hypoxia. Contributions of hypoxia-inducible factor-1, activator protein-1, GATA-2, AND p300/CBP. *J. Biol. Chem.* **276**, 12645-12653.
- Zhou, B., Wu, B., Tompkins, K. L., Boyer, K. L., Grindley, J. C. and Baldwin, H. S. (2005). Characterization of Nfatc1 regulation identifies an enhancer required for gene expression that is specific to pro-valve endocardial cells in the developing heart. *Development* **132**, 1137-1146.
- Zhou, Y., Lim, K. C., Onodera, K., Takahashi, S., Ohta, J., Minegishi, N., Tsai, F. Y., Orkin, S. H., Yamamoto, M. and Engel, J. D. (1998). Rescue of the embryonic lethal hematopoietic defect reveals a critical role for GATA-2 in urogenital development. *EMBO J.* **17**, 6689-6700.
- Zhou, Y., Yamamoto, M. and Engel, J. D. (2000). GATA2 is required for the generation of V2 interneurons. *Development* **127**, 3829-3838.
